# Supplementary material for: Exome Sequencing of Native Populations From the Amazon Reveals Patterns on the Peopling of South America
Source: Front Genet. 2020 Oct 29;11:548507. doi: 10.3389/fgene.2020.548507 (PMC7660019; doi:10.3389/fgene.2020.548507)
Supplement: Supplementary Table 3 — Sequencing quality control metrics for the samples generate here. [file Table_3.XLSX]

## Sheet: Summary
Average QC Statistics	Pairs	Million
Pairs	43674651	43.6747
Filtered Pairs	42640762	42.6408
Unique Pairs	36325486	36.3255
% Unique Pairs	0.853	0.853
Unique Aligned	72538599	72.5386
% Unique Aligned	0.852	0.852
Avg. Target Coverage	46.8	46.8
% Target Bases >= 10X	0.888	0.888
% Target Bases >= 20X	0.77	0.77

## Sheet: QC Statistics
Sample	Bait	Target Bases	Pairs	Filtered Pairs	Unique Pairs	% Unique Pairs	Unique Aligned	% Unique Aligned	Avg. Target Coverage	% Target Bases >= 10X	% Target Bases >= 20X
AMZ38	Nextera RapidCapture	45326818	39050914	37717376	34086328	0.90373	68088447	0.902614	31.065	0.784251	0.615233
AMZ13	Nextera RapidCapture	45326818	41552054	40104141	36030448	0.898422	71952603	0.897072	33.2235	0.799439	0.640363
AMZ7	Nextera RapidCapture	45326818	53866932	52305959	47248042	0.903301	94391420	0.902301	48.9419	0.87548	0.76805
AMZ34	Nextera RapidCapture	45326818	50485440	49046573	44121002	0.899574	88109250	0.89822	50.5633	0.893167	0.793035
AMZ36	Nextera RapidCapture	45326818	30667071	29872013	27499471	0.920576	54942501	0.919632	35.0272	0.856491	0.699118
AMZ48	Sure Select Exome V6	60456963	45747318	44738991	39115062	0.874295	78108642	0.872937	53.8468	0.96	0.898054
AMZ25	Sure Select Exome V6	60456963	41427495	40364850	21990008	0.544781	43842584	0.543079	26.5674	0.905058	0.651733
AMZ35	Nextera RapidCapture	45326818	40762084	39230143	35031505	0.892974	69955986	0.89161	29.7755	0.767491	0.593211
AMZ49	Nextera RapidCapture	45326818	58417662	56846890	51142912	0.899661	102172026	0.89866	56.9942	0.876624	0.770725
AMZ6	Sure Select Exome V6	60456963	39969489	39055579	33600017	0.860313	67052872	0.858429	37.0693	0.934689	0.753782
AMZ29	Sure Select Exome V6	60456963	46329237	45019876	27257386	0.605452	54359236	0.603725	33.7411	0.941645	0.801045
AMZ10	Sure Select Exome V6	60456963	52454744	51626856	40376866	0.78209	80652408	0.781109	57.0335	0.948415	0.872173
AMZ32	Nextera RapidCapture	45326818	25919367	25195971	22887371	0.908374	45721599	0.90732	24.7472	0.758549	0.547752
AMZ12	Nextera RapidCapture	45326818	31807121	31013008	28418357	0.916337	56782280	0.915459	34.4857	0.851398	0.694354
AMZ22	Nextera RapidCapture	45326818	37547018	36367780	33213400	0.913264	66345127	0.912142	32.966	0.82024	0.655232
AMZ4	Nextera RapidCapture	45326818	28800659	28031533	25703980	0.916967	51355966	0.916039	29.7146	0.812698	0.625368
AMZ41	Nextera RapidCapture	45326818	20007103	19347346	17790027	0.919507	35540148	0.918476	16.5748	0.633413	0.364919
AMZ56	Nextera RapidCapture	45326818	28959593	28170759	25916379	0.919974	51781140	0.919058	30.8441	0.825918	0.647522
AMZ58	Nextera RapidCapture	45326818	26762101	25967757	23624086	0.909747	47196898	0.90876	24.3178	0.747067	0.532468
AMZ2	Nextera RapidCapture	45326818	46176238	45055277	41568283	0.922606	83050290	0.921649	66.2572	0.945963	0.897332
AMZ18	Nextera RapidCapture	45326818	87458481	85319630	77145363	0.904192	154107792	0.90312	101.168	0.951967	0.921912
AMZ11	Nextera RapidCapture	45326818	16973653	16318891	14949836	0.916106	29866375	0.915086	12.7111	0.528532	0.25181
AMZ27	Nextera RapidCapture	45326818	64600836	62752544	56033875	0.892934	111930079	0.891837	61.9109	0.911799	0.83564
AMZ5	TrueSeq Rapid Exome	45326818	59386752	58072641	40759163	0.701865	81326159	0.700211	52.9508	0.852731	0.746479
AMZ42	Sure Select Exome V6	60456963	61585536	60244411	56867207	0.943942	113573727	0.942608	82.6271	0.965241	0.943846
AMZ44	Sure Select Exome V6	60456963	61092596	59725293	55647406	0.931723	111103174	0.930118	82.1986	0.966369	0.946435
AMZ47	Sure Select Exome V6	60456963	42386745	41182130	34088596	0.827752	68055647	0.826276	44.6602	0.956074	0.883126
AMZ23	Sure Select Exome V6	60456963	45284640	44272581	41048269	0.927171	81953759	0.925559	58.5081	0.96149	0.918083
AMZ3	Sure Select Exome V6	60456963	49981300	49228893	38923327	0.79066	77745418	0.789632	59.6712	0.947842	0.872286
AMZ50	Sure Select Exome V6	60456963	40937224	40336585	32851031	0.814423	65604852	0.813218	50.1913	0.936086	0.827542
AMZ51	Sure Select Exome V6	60456963	40777420	40185847	31592679	0.786164	63117329	0.785318	46.8574	0.942552	0.848238
AMZ26	Sure Select Exome V6	60456963	41464085	40834801	33036552	0.809029	65982365	0.807918	51.1517	0.944951	0.854341
AMZ37	Sure Select Exome V6	60456963	25837362	25463492	21860591	0.858507	43678105	0.857661	34.3639	0.892064	0.696101
AMZ16	Sure Select Exome V6	60456963	41167295	40578432	31454771	0.77516	62838667	0.774287	46.756	0.943933	0.858163
AMZ57	Sure Select Exome V6	60456963	36349105	35835922	26585837	0.741877	53088979	0.740723	39.9652	0.933323	0.814056
AMZ21	Sure Select Exome V6	60456963	50246376	49040086	43212684	0.881171	86283087	0.87972	60.1754	0.964959	0.928878
AMZ19	Nextera RapidCapture	45326818	25667244	24704510	22438959	0.908294	44823291	0.907188	19.1598	0.665199	0.431684
AMZ20	Nextera RapidCapture	45326818	31690419	30825915	28203209	0.914919	56334482	0.913752	34.0573	0.845727	0.684701
AMZ30	Nextera RapidCapture	45326818	39689891	38412331	34750270	0.904664	69304618	0.902114	33.1778	0.819458	0.657496
AMZ1	Sure Select Exome V6	60456963	39623701	38729380	36417820	0.940315	72743889	0.939131	52.5221	0.958806	0.902028
AMZ15	Sure Select Exome V6	60456963	42974087	42003513	38683367	0.920956	77242845	0.919481	55.058	0.960724	0.911668
AMZ33	Sure Select Exome V6	60456963	35606446	35067334	26334409	0.750967	52484127	0.748334	40.0055	0.887296	0.724527
AMZ45	Sure Select Exome V6	60456963	45352879	44350398	30633320	0.690711	61134337	0.68922	37.8641	0.947812	0.85148
AMZ31	Sure Select Exome V6	60456963	41644261	40669568	28996279	0.712972	57851652	0.71124	35.4706	0.942858	0.83019
AMZ53	Sure Select Exome V6	60456963	42484819	41619910	37552890	0.902282	74916149	0.900004	43.8546	0.954735	0.878897
AMZ17	Sure Select Exome V6	60456963	39485058	38707349	34566046	0.89301	69026319	0.891644	42.5551	0.955939	0.871408
AMZ40	Nextera RapidCapture	45326818	41871050	40782850	37251641	0.913414	74407895	0.912245	51.8552	0.914997	0.826239
AMZ8	Nextera RapidCapture	45326818	34066898	33169282	30197073	0.910393	60336167	0.909519	35.7851	0.846953	0.697554
AMZ52	Sure Select Exome V6	60456963	39598461	39011640	31710584	0.812849	63356865	0.812025	49.616	0.934546	0.829169
AMZ54	Sure Select Exome V6	60456963	42134209	41504798	33348119	0.803476	66622818	0.802592	51.7388	0.936654	0.835969
AMZ9	Sure Select Exome V6	60456963	38473800	37592751	30334669	0.806929	60530086	0.805077	37.5033	0.946797	0.83973
AMZ14	Sure Select Exome V6	60456963	37788146	37003198	30999242	0.837745	61902588	0.836449	38.2036	0.933306	0.801434
AMZ43	Sure Select Exome V6	60456963	35204431	34441588	31741582	0.921606	63391533	0.920276	41.6885	0.947216	0.840809
AMZ24	Sure Select Exome V6	60456963	85492109	83659711	78432904	0.937523	156620012	0.936054	114.642	0.968967	0.956117
AMZ28	Nextera RapidCapture	45326818	85239517	83205235	74836530	0.899421	149515986	0.898477	95.907	0.94836	0.915627
AMZ39	Sure Select Exome V6	60456963	51824277	50566499	45420228	0.898228	90681934	0.89666	66.059	0.963871	0.931798
AMZ46	TrueSeq Rapid Exome	45326818	57744534	56509277	38145430	0.67503	76093503	0.673283	50.5744	0.858513	0.75114
AMZ55	TrueSeq Rapid Exome	45326818	47234480	46156320	33205515	0.719414	66260732	0.717786	45.177	0.848016	0.727563
